1 **Title:** Success in vaccination programming through community health workers: A case  
2 study of Nepal, Senegal, and Zambia

3 **Authors:** Emily Ogutu<sup>a</sup> and Anna S. Ellis<sup>a</sup>, Kyra A. Hester<sup>a</sup>, Katie Rodriguez<sup>a</sup>, Zoe  
4 Sakas<sup>a</sup>, Chandni Jaishwal<sup>a</sup>, Chenmua Yang<sup>a</sup>, Sameer Dixit<sup>b</sup>, Anindya S. Bose<sup>e</sup>, Moussa  
5 Sarr<sup>d</sup>, William Kilembe<sup>c</sup>, Robert A. Bednarczyk<sup>a</sup>, Matthew C. Freeman<sup>a</sup>

6 **Affiliations:**

7 <sup>a</sup> Rollins School of Public Health, Emory University, Atlanta, GA, USA

8 <sup>b</sup> Center for Molecular Dynamics Nepal, Kathmandu, Nepal

9 <sup>c</sup> Center for Family Health Research in Zambia, Lusaka, Zambia

10 <sup>d</sup> Institut de Recherche en Santé de Surveillance Epidemiologique et de Formation  
11 (IRESSEF), Dakar, Senegal

12 <sup>e</sup> WHO Nepal Immunization Preventable Disease Division

13 \* Corresponding author: Matthew C. Freeman; [matthew.freeman@emory.edu](mailto:matthew.freeman@emory.edu) |

14 [www.FreemanResearchGroup.org](http://www.FreemanResearchGroup.org)

15

16 **Contributions:** KAH, ASE, SD, MCF, MS, RAB: project conceptualization and  
17 methodology; KAH, KR, ASE, MCF, WK, MS, SD, RAB, ASB: investigation and data  
18 curation; ASE, EO, KAH, KR, ZS, CJ, CY, MCF, RAB: formal analysis; EO, ASE, KAH, KR,  
19 ZS, CJ, CY: writing - original; EO, ASE, KAH, KR, ZS, CY, MCF, SD, MS, RAB, ASB:  
20 writing – review and editing; all authors provided approval of the submitted version.

21

## 22 Abstract

23 **Introduction:** Community health workers are essential to frontline health outreach  
24 throughout low- and middle-income countries, including programming for early  
25 childhood immunization. The World Health Organization estimates a projected shortage  
26 of 18 million health workers by 2030. Understanding how community health workers are  
27 engaged for successful early childhood vaccination among countries who showed success  
28 in immunization coverage would support evidence-based policy guidance across contexts.  
29 To that end, we identified factors of community health worker programs that contributed  
30 to improved vaccination coverage in Nepal, Senegal, and Zambia.

31 **Methods:** We conducted interviews and focus group discussions at the national,  
32 regional, district, health facility, and community levels of the health systems of Nepal,  
33 Senegal, and Zambia, and used thematic analysis to investigate contributing factors of  
34 community health worker programming that supported early childhood immunization  
35 within each country and across contexts. We developed a model that could be used for  
36 assessment and adaptation based on lessons learned.

37 **Findings:** Across all countries, implementation of vaccination programming relied  
38 principally on the 1) organization, 2) motivation, and 3) trust of community health  
39 workers. Organization was accomplished by expanding cadres of community health  
40 workers to carry out their roles and responsibilities related to vaccination. Motivation of  
41 community health workers was supported by intrinsic and extrinsic incentives. Trust was  
42 expressed by communities due to community health worker respect and value placed on  
43 work.

44 **Conclusion:** Improvements in immunization coverage followed successful community  
45 health worker programs, facilitated by diversification of cadres, roles and responsibilities,  
46 motivation, and trust. With the continued projection of health worker shortages,  
47 especially in low-income countries, community health workers bridged the equity gap in  
48 access to vaccination services by enabling wider reach to minority populations and  
49 populations in hard-to-reach areas. Although improvements in vaccination programming  
50 were seen in all three countries - including government - commitment to addressing  
51 human resource deficits, training and remuneration; workload, low and inconsistent  
52 compensation, inconsistency in training duration and scope, and supervision are still  
53 major challenges to immunization programming. Vaccination and health decision-  
54 makers should consider organization, motivation, and trust of community health workers  
55 to improve the implementation of immunization programming.

56

57 Key Words: Community Health Volunteer; Routine Immunization; Exemplars in Global  
58 Health; remuneration

59

## 60 Introduction

61 Despite efforts to increase early childhood immunization over the past 20 years, many  
62 countries continue to report excessive morbidity and mortality from vaccine-preventable  
63 diseases. Maintaining high vaccination coverage is of economic benefit by preventing  
64 early childhood disease, improving health outcomes, and reducing expenditure on

65 treatment[1, 2]. The Immunization Agenda 2030 (IA2030) aims to maintain hard-won  
66 gains in immunization by leaving no one behind at any stage of life through increasing  
67 equitable access and use of new and existing vaccines, and strengthening immunization  
68 within primary healthcare. Through this strategy, countries define their own targets and  
69 timelines to achieve IA2030 goals[3]. Achieving this goal requires strategizing to address  
70 multiple inefficiencies, including health system strengthening, infrastructural  
71 development and increased human resources.

72 The 2030 targets for the Global Strategy for Human Resources for Health, developed for  
73 low and middle-income countries, are to create, fill, and sustain at least 10 million  
74 additional jobs in the health and social care sectors to address unmet needs for the  
75 equitable and effective coverage of health services[4]. The World Health Organization  
76 (WHO) estimates a projected shortage of 18 million health workers by 2030, mostly in  
77 low- and lower-middle-income countries[5]. Estimates include the need for 44.5 basic  
78 health workers (e.g., doctors, nurses, and midwives) per 10,000 population; however,  
79 only half of the WHO member states have that level at present, with Southeast Asia and  
80 sub-Saharan Africa having the greatest absolute shortage of health workers[4].  
81 Community health workers (CHWs)- are community members who volunteer to serve as  
82 frontline healthcare workers in underserved communities to bridge the human resource  
83 deficit[6]. Continued expansion of the numbers, functions, training, and support of  
84 CHWs and provision of financial packages commensurate to their job demands and  
85 workload could bridge the gap because of the feasibility of CHWs deployment and  
86 effectiveness[7, 8].

87 As frontline health workers, CHWs play a critical role in routine vaccination programming  
88 by generating demand for childhood vaccination; connecting community members to the  
89 formalized health care system; and working closely with and in communities, schools, and  
90 religious facilities[9, 10]. A concurrent analysis of our research showed that CHWs played  
91 a crucial role in demand generation in Nepal, Senegal, and Zambia[11-14]. The WHO  
92 health policy guidelines for CHWs program (2018) recommends the following: 1)  
93 community engagement in selection, 2) training, 3) remuneration, and 4) supervision.  
94 Coupled with other strategies, this policy aims to increase the efficiency and productivity  
95 of CHWs towards service delivery[8]. Yet, despite these recommendations, frontline  
96 health workers in many countries – the vast majority of which are women - remain unpaid  
97 and are provided minimal training and supervision[15]. Evidence suggests that scaling up  
98 and sustaining CHW programs requires effective program design and management,  
99 including adequate training, supervision, motivation and funding, community  
100 acceptability, and support from political leaders and other healthcare providers[16].

101 The purpose of this analysis was to identify factors of volunteer community health worker  
102 programming that successfully contributed to vaccination initiatives in Nepal, Senegal,  
103 and Zambia. We describe 1) CHW programming organization- cadres, roles and  
104 responsibilities, 2) CHW motivation- recognition, tangible incentives, capacity building,  
105 empathy and compassion; and, 3) trust- positive social capital, mutual trust- through  
106 community engagement and knowledge sharing. We discuss how these factors have  
107 contributed to success in service delivery and increased routine immunization coverage  
108 in the context of the three countries. Program implementation strategies involving active

109 engagement of CHWs in Nepal, Senegal, and Zambia may offer insight into what are  
110 critical contributors to immunization access and intent to vaccination.

## 111 Methods

112 We applied a multiple case study design to explore critical success factors of vaccine  
113 delivery systems in three countries with high vaccination rates: Nepal, Senegal, and  
114 Zambia[17]. This analysis is nested within the Vaccine Delivery project within the  
115 Exemplars in Global Health program[17, 18]. We employed a qualitative analysis to  
116 investigate factors that contributed to high and sustained vaccination coverage through  
117 key informant interviews (KIIs) and focus group discussions (FGDs) at the national,  
118 regional, district, health facility, and community levels of the health system. We  
119 triangulated these findings with quantitative analyses using publicly available data.

120 In this analysis, we selected three themes- organization, motivation, and trust as they  
121 relate to CHWs and how these contributed to increased immunization coverage in Nepal,  
122 Senegal, and Zambia. We provide operational definitions of the themes and some specific  
123 examples of the components as they emerged from data (Table 1). The protocol of the  
124 primary analysis, along with individual case studies of countries and a synthesis case  
125 study, are published separately[12-14, 17].

126 ***Table 1. Definitions of themes as derived from data***

| Domain | Definition and Examples |
|--------|-------------------------|
|--------|-------------------------|

|                        |                                                                                                                                                                                                                                                                                                                                                                                                                           |
|------------------------|---------------------------------------------------------------------------------------------------------------------------------------------------------------------------------------------------------------------------------------------------------------------------------------------------------------------------------------------------------------------------------------------------------------------------|
| <p>1. Organization</p> | <p>Expansion of CHWs with different cadres, and roles and responsibilities; may be based on the scope of work, reimbursement, qualifications, language, education level, geographic region, and their distinct roles and responsibilities. These CHWs work together to improve community health and increase vaccination rates.</p>                                                                                       |
| <p>1.A. Cadre</p>      | <p>Specialized types of CHW providing immunization-related services in the communities</p> <ul style="list-style-type: none"><li>• Female Community Health Volunteers, Mother groups, Village Development Committees (Nepal)</li><li>• <i>Agents de Santé Communautaire, Matrones, Dispensateur de Soins à Domicile, Bajenu Gox, Relais</i> (Senegal)</li><li>• Neighborhood Health Committees, Safe Motherhood</li></ul> |

|                                 |                                                                                                                                                                                                                                                                                                                                                                                                                                                                               |
|---------------------------------|-------------------------------------------------------------------------------------------------------------------------------------------------------------------------------------------------------------------------------------------------------------------------------------------------------------------------------------------------------------------------------------------------------------------------------------------------------------------------------|
|                                 | <p>Action Groups, Growth</p> <p>Monitoring Promoters (Zambia)</p>                                                                                                                                                                                                                                                                                                                                                                                                             |
| 1.B. Roles and responsibilities | <p>Work and functions of CHWs related to immunizations activities, based on specific age ranges of the CHWs, ethnicities, language skills and qualifications, including:</p> <ul style="list-style-type: none"> <li>• Defaulter tracing which involves finding children who missed their scheduled immunization.</li> <li>• Outreach planning</li> <li>• Data collection and reporting</li> <li>• Community mobilization</li> <li>• Public awareness and education</li> </ul> |
| 2. Motivation                   | <p>The reason, desire (e.g., empathy, compassion), or willingness of a volunteer community health worker to do their work [19-21].</p>                                                                                                                                                                                                                                                                                                                                        |
| 2.A. Recognition                | <p>Identification of CHWs by the communities and healthcare workers as integral members of healthcare team due to their knowledge and close</p>                                                                                                                                                                                                                                                                                                                               |



|                                 |                                                                                                                                                                                                                                                                                                                                                                                                                                                                                                                                                       |
|---------------------------------|-------------------------------------------------------------------------------------------------------------------------------------------------------------------------------------------------------------------------------------------------------------------------------------------------------------------------------------------------------------------------------------------------------------------------------------------------------------------------------------------------------------------------------------------------------|
|                                 | <p>understanding of the communities they serve. Examples include:</p> <ul style="list-style-type: none"><li>• Respect by community members</li><li>• Support from community</li><li>• Value placed on the work of CHWs</li><li>• National, regional or local celebrations</li></ul>                                                                                                                                                                                                                                                                   |
| <p>2.B. Tangible incentives</p> | <p>Factors - direct or indirect, financial or non-financial - that increase motivation to engage and perform well, which include specific forms of reward[22].</p> <p>Examples include:</p> <ul style="list-style-type: none"><li>• Money, including salary and remuneration for specific training</li><li>• Food, usually staples of diet</li><li>• Childcare</li><li>• Harvesting assistance</li><li>• Bicycles, uniforms, raincoats, stationary</li><li>• Certificates, including-training completion</li><li>• Free healthcare services</li></ul> |

|                                    |                                                                                                                                                                                                                                                                                                                                                              |
|------------------------------------|--------------------------------------------------------------------------------------------------------------------------------------------------------------------------------------------------------------------------------------------------------------------------------------------------------------------------------------------------------------|
| <p>2.C. Capacity building</p>      | <p>Includes training and supervision of CHWs and the downward impact on the community, including:</p> <ul style="list-style-type: none"><li>• Increased self-efficacy to perform responsibilities</li><li>• Increased knowledge of diseases, diagnoses, treatment, and facilitation</li><li>• Contribution to program planning and decision-making</li></ul> |
| <p>2.D. Empathy and compassion</p> | <p>The ability to understand and share the feelings of others, show concern for the suffering or misfortune of others, and prioritize the needs of other community members - all of which motivated CHWs to perform their roles.</p>                                                                                                                         |
| <p>3. Trust</p>                    | <p>Positive social capital or social relationship, as an element of truth telling, empowering others through knowledge.</p>                                                                                                                                                                                                                                  |

|                                  |                                                                                                                                                                                                                                                                                                                                                                                                                                                                                      |
|----------------------------------|--------------------------------------------------------------------------------------------------------------------------------------------------------------------------------------------------------------------------------------------------------------------------------------------------------------------------------------------------------------------------------------------------------------------------------------------------------------------------------------|
| <p>3.A. Community engagement</p> | <p>The involvement of communities in decision making and in planning, design, governance and delivery of services[23].</p> <ul style="list-style-type: none"><li>• Community members involvement in selection of CHWs</li><li>• CHW as residents of their respective communities</li><li>• CHWs speak the same language as community members</li><li>• CHWs relaying health information to community members and sharing feedback from the community to healthcare workers</li></ul> |
| <p>3.B. Knowledge sharing</p>    | <p>Activities through which information and skills are shared between individuals or groups can include frequent interaction, social relationships between CHWs, communities, and health workers[24].</p>                                                                                                                                                                                                                                                                            |

## 128 2.1. Study settings

129 Nepal, Senegal, and Zambia were selected based on their success at achieving high and  
130 sustained growth in early childhood vaccination, based on historical (i.e., 2000-2018, up  
131 to the point of starting this project) DTP1 and DTP3 coverage estimates. Details are  
132 explained elsewhere [17]. Three regions within each country were identified in  
133 consultation with national stakeholders and available data[12-14]. Ministry of Health  
134 (MoH) officials and in-country partner organizations facilitated site selection and data  
135 collection activities. Each country has a slightly different name for their Ministry of  
136 Health (e.g., Ministry of Health and Population in Nepal; Ministry of Health and Social  
137 Action in Senegal), but all will be referred to as “MoH” throughout for simplicity.

## 138 2.3. Qualitative data collection and analysis

139 Qualitative data were collected at the national, regional, district, health facility, and  
140 community levels. Data collection was from August 2019 to April 2021. The interview  
141 guides were informed by the Consolidated Framework for Implementation Research  
142 (CFIR) and the Context and Implementation of Complex Interventions (CICI)  
143 frameworks [25, 26]. KII and FGD guides were translated into national and regional  
144 languages by research assistants, piloted before use, and adjusted iteratively throughout  
145 data collection. An initial list of KIIs was developed with local research partners and MoH  
146 officials; snowball sampling was used to identify additional key informants. Caregivers  
147 and CHWs were recruited for FGDs from health facility catchment areas with the  
148 assistance of local health staff. The duration of KIIs and FGDs averaged one and a half  
149 hours. KIIs and FGDs were audio-recorded with the permission of participants. Research

150 files, recordings, and transcriptions were de-identified, password protected, and kept on  
 151 a secure server. The activities are summarized in Table 2.

152 **Table 2. Summary of countries, partner organizations, regions, districts and**  
 153 **data Collection Activities**[27]

| Country                                   | Nepal                                |                               | Senegal                                                                                                   |                                    | Zambia                                      |                             |
|-------------------------------------------|--------------------------------------|-------------------------------|-----------------------------------------------------------------------------------------------------------|------------------------------------|---------------------------------------------|-----------------------------|
| In Country Research Partner               | Center for Molecular Dynamics, Nepal |                               | Institut de Recherche en Santé de Surveillance, de Surveillance Epidémiologique et de Formation (IRESSEF) |                                    | Center for Family Health Research in Zambia |                             |
| Data collection period (MM/YYYY)          | 8/2019 – 12/2019                     |                               | 12/2020 - 4/2021                                                                                          |                                    | 10/2019 – 02/2020                           |                             |
| Regions and Districts                     |                                      |                               |                                                                                                           |                                    |                                             |                             |
| Region 1                                  | Madhes*                              | Dhanusha, Bara, Mahottari     | Ziguinchor                                                                                                | Ziguinchor, Oussouye, Diouloulou   | Lusaka                                      | Lusaka, Rufunsa, Chongwe    |
| Region 2                                  | Bagmati                              | Makwanpur, Dolakha, Kathmandu | Dakar                                                                                                     | Rufisque, Mbao, Keur Massar        | Central                                     | Chibombo, Chitambo, Serenje |
| Region 3                                  | Gandaki Pradesh                      | Kaski, Myagdi, Nawalparasi    | Tambacounda                                                                                               | Tambacoun da, Koumpentoum, Goudiry | Luapula                                     | Chipili, Nchelenge, Samfya  |
| Key Informant Interviews                  |                                      |                               |                                                                                                           |                                    |                                             |                             |
| <i>Key: Number of KIIs (Participants)</i> | <b>79 (79)</b>                       |                               | <b>62 (63)</b>                                                                                            |                                    | <b>66 (85)</b>                              |                             |
| National level government staff           | 11 (11)                              |                               | 5 (5)                                                                                                     |                                    | 11 (12)                                     |                             |
| Partner organization staff                | 8 (8)                                |                               | 4 (4)                                                                                                     |                                    | 11 (15)                                     |                             |

|                                 |                  |                 |                  |
|---------------------------------|------------------|-----------------|------------------|
| Regional health staff           | 5 (5)            | 7 (7)           | 6 (8)            |
| District health staff           | 15 (15)          | 38 (38)         | 10 (19)          |
| Health facility staff           | 23 (23)          | 6 (6)           | 7 (10)           |
| Community leaders               | 15 (15)          | 2 (2)           | 10 (10)          |
| Community health workers **     | 2 (2)            | -               | 11 (11)          |
| <b>Focus Group Discussions</b>  |                  |                 |                  |
| <i>Key: Number of FGDs</i>      | <b>30 (191)</b>  | <b>19 (128)</b> | <b>22 (132)</b>  |
| <i>(Participants)</i>           |                  |                 |                  |
| Community health workers **     | 9 (60)           | 10 (65)         | 10 (60)          |
| Mothers                         | 9 (60)           | 9 (63)          | 8 (48)           |
| Fathers                         | 6 (36)           | -               | 1 (6)            |
| Grandparents                    | 6 (35)           | -               | 3 (18)           |
| <b>Total (per country)</b>      | <b>109 (270)</b> | <b>81 (191)</b> | <b>88 (217)</b>  |
| <b>Total (across countries)</b> | <b>-</b>         | <b>-</b>        | <b>278 (678)</b> |

154 \*Includes female community health volunteers (FCHV) in Nepal, vaccinators, bajenu gox, Agents de Santé  
 155 Communautaire (ASCs) in Senegal, and volunteer community health workers and neighborhood health  
 156 committee members in Zambia.

157

## 158 2.4. Ethical approval

159 The study was considered exempt by the Institutional Review Board committee of Emory  
 160 University, Atlanta, Georgia, USA (IRB00111474), and was approved by the National  
 161 Health Research Committee (NHRC; Reg. no. 347/2019) in Kathmandu, Nepal; the  
 162 National Ethical Committee for Health Research (CERNS; Comité National d’Ethique  
 163 pour la Recherche en Santé) in Dakar, Senegal (00000174); the University of Zambia  
 164 Biomedical Research Ethics Committee (Federal Assurance No. FWA00000338, REF.  
 165 No. 166-2019); and the National Health Research Authority in Zambia. All participants

166 provided informed consent, either written or with their thumbprint, in the presence of a  
167 witness.

## 168 Findings

169 We analyzed strategies and delivery methods of voluntary CHWs and how they  
170 contributed to routine vaccination programming in Nepal, Senegal, and Zambia. First, we  
171 developed a framework specific to CHWs and their involvement in vaccine delivery and  
172 uptake. We included aspects of our general research framework and other scales and  
173 frameworks specific to CHWs[28, 29]. We found that CHWs' contribution to  
174 improvement in healthcare delivery and utilization in different settings aligned with the  
175 broad domains around cultural congruence, social support, mutual trust, and others[20,  
176 28, 29]. We then focused on the themes of organization, trust, and motivation (Fig. 1) to  
177 compare success factors across these countries.

178 **Fig. 1. Summary figure of CHW domains that shaped vaccination in Nepal,**  
179 **Senegal, and Zambia**

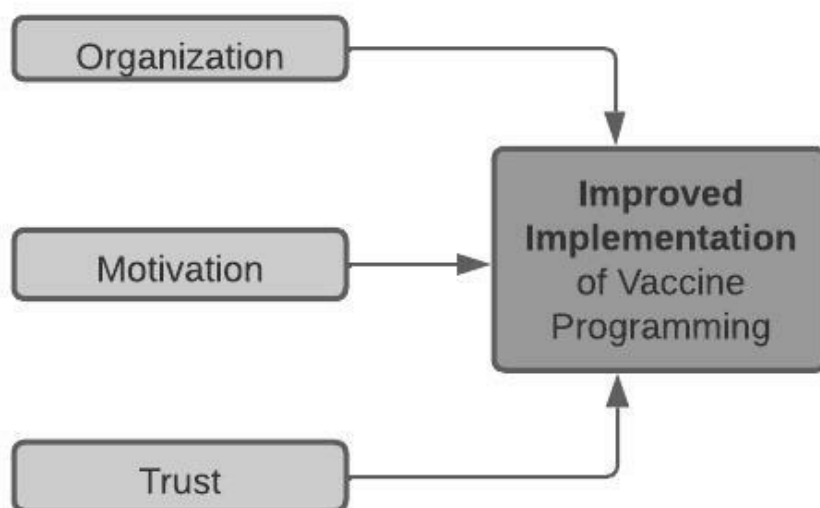

180

181 For this analysis, we chose to focus on the roles of volunteer CHWs, recognizing that in  
182 all countries, at least one of the cadres (e.g., *bajenu gox*) was more trusted by  
183 communities and was instrumental in the vaccination programming (Table 3). CHWs  
184 capitalized on their strong community role to educate community members, combat  
185 misinformation, conduct outreach and provide personalized service to caregivers.  
186 Themes around 1) organization, 2) motivation, and 3) trust were derived from the data  
187 and contributed to improvements in vaccination program implementation (Table 1).  
188 Organization through expansion of CHW types motivated CHWs to carry out their roles  
189 and responsibilities related to vaccination. Trust that communities and healthcare  
190 workers expressed to CHWs through respect and value placed on work contributed to  
191 CHWs' motivation resulting in the improved implementation of vaccination  
192 programming.



### 193 3.1. Organization

194 In all three countries, key informants reported that recently introduced cadres and  
195 diversification of roles and responsibilities improved implementation of vaccination  
196 programming. The roles and responsibilities of CHWs shifted and often expanded, and  
197 this was subsequent with increased funding and focus on health services strengthening.  
198 Governments created more positions/cadres, defined, and aligned responsibilities with  
199 specific qualifications, which bolstered frontline health outreach and services (Table 3).  
200 Current volunteer CHW's roles across the countries required specific qualifications,  
201 training, and responsibilities. CHW roles included generating public awareness,  
202 dispelling misinformation, defaulter tracking, and data collection.

203 **3.1.1 Cadre.** Each country had different types of CHWs who played specific roles in  
204 immunization programming. These cadres were created to distribute the heavy workload,  
205 assign specific roles and responsibilities to specialized staff, and improve overall  
206 coordination and delivery of services. In Nepal, FCHVs played a major role in  
207 immunization, they created awareness on immunization, and linked the communities to  
208 the healthcare facilities. Senegal had five different cadres (Table 3) involved in different  
209 aspects of immunization. In Zambia, neighborhood health committees, safe motherhood  
210 action groups and growth monitoring promoters played a critical role in improving  
211 vaccination coverage through the roles and responsibilities they held as discussed in the  
212 next section.

213 The specific characteristics and detailed elaboration of each cadre of the CHWs in Nepal,  
214 Senegal, and Zambia are outlined in Table 3.



216 **Table 3: Community Health Workers cadres, roles, recruitment requirements, training and**  
 217 **remuneration by Country**

|       | <b>Cadre title</b>                                     | <b>Established</b>                                                                                                                                             | <b>Roles and responsibilities</b>                                                                                                                                                                                                                                                                                                                                                                                                                                                 | <b>Key Requirements</b>                                                                                                                                                                                               | <b>Reported Training</b>                                                                                        | <b>Remuneration*</b>                                                                                        |
|-------|--------------------------------------------------------|----------------------------------------------------------------------------------------------------------------------------------------------------------------|-----------------------------------------------------------------------------------------------------------------------------------------------------------------------------------------------------------------------------------------------------------------------------------------------------------------------------------------------------------------------------------------------------------------------------------------------------------------------------------|-----------------------------------------------------------------------------------------------------------------------------------------------------------------------------------------------------------------------|-----------------------------------------------------------------------------------------------------------------|-------------------------------------------------------------------------------------------------------------|
| Nepal | Female<br>Community<br>Health<br>Volunteers<br>(FCHVs) | <ul style="list-style-type: none"> <li>Initiated in 1988, played critical role since 1991, established in 75 districts, 52,000 FCHVs throughout the</li> </ul> | <ul style="list-style-type: none"> <li>Treatment of acute diarrhea and respiratory infections, nutrition, pre-natal care, distribution of family planning commodities</li> <li>Outreach services: coordination and attendance, support national campaigns</li> <li>Door-to-door follow up of left out children</li> <li>Reminders on outreach or vaccine days</li> <li>Lead mother health group meetings and disseminate health information</li> <li>Defaulter tracing</li> </ul> | <ul style="list-style-type: none"> <li>Selected by local community – mother health groups</li> <li>Married and reside in wards where they serve</li> <li>Preference for literacy</li> <li>No other income-</li> </ul> | <ul style="list-style-type: none"> <li>Initial training (18 days)</li> <li>Refresher training yearly</li> </ul> | <ul style="list-style-type: none"> <li>Receive 10,000 rupees from the government upon retirement</li> </ul> |

|         |                                                   |                                                                     |                                                                                                                                                                                                                                                                                                                                                          |                                                                                                                                                                                                                            |                                                                                                   |                                                                                                                                              |
|---------|---------------------------------------------------|---------------------------------------------------------------------|----------------------------------------------------------------------------------------------------------------------------------------------------------------------------------------------------------------------------------------------------------------------------------------------------------------------------------------------------------|----------------------------------------------------------------------------------------------------------------------------------------------------------------------------------------------------------------------------|---------------------------------------------------------------------------------------------------|----------------------------------------------------------------------------------------------------------------------------------------------|
|         |                                                   | country.[30]                                                        | <ul style="list-style-type: none"> <li>• Report data on births &amp; vaccinations</li> </ul>                                                                                                                                                                                                                                                             | <p>generating activities</p> <ul style="list-style-type: none"> <li>• Willing to volunteer</li> </ul>                                                                                                                      |                                                                                                   |                                                                                                                                              |
| Senegal | <i>Agents de santé communautaires</i> (ASCs) [31] | <ul style="list-style-type: none"> <li>• Since the 1950s</li> </ul> | <ul style="list-style-type: none"> <li>• Reproductive, sexual health, maternal child health, antenatal care, adolescent health, family planning, nutrition, malaria, HIV/AIDs</li> <li>• Education on vaccines</li> <li>• Support outreach strategies</li> <li>• Referral of clients to health posts</li> <li>• Supervised by nurse in charge</li> </ul> | <ul style="list-style-type: none"> <li>• 17-47 years of age</li> <li>• Read and write in French</li> <li>• Speak local language</li> <li>• From and selected by local community</li> <li>• Willing to volunteer</li> </ul> | <ul style="list-style-type: none"> <li>• Initial training (30+ days, 10 days practice)</li> </ul> | <ul style="list-style-type: none"> <li>• Inconsistent - depends on project /responsibilities</li> <li>• Determined by CDS or NGOs</li> </ul> |

|                                                                              |                                                                                         |                                                                                                                                                                                                                                                                                                                                                                                              |                                                                                                                                                                                                                            |                                                                                                   |                                                                                                                           |
|------------------------------------------------------------------------------|-----------------------------------------------------------------------------------------|----------------------------------------------------------------------------------------------------------------------------------------------------------------------------------------------------------------------------------------------------------------------------------------------------------------------------------------------------------------------------------------------|----------------------------------------------------------------------------------------------------------------------------------------------------------------------------------------------------------------------------|---------------------------------------------------------------------------------------------------|---------------------------------------------------------------------------------------------------------------------------|
| Matrones[31 ]                                                                | <ul style="list-style-type: none"> <li>• Not clear when this was established</li> </ul> | <ul style="list-style-type: none"> <li>• Reproductive and sexual health, maternal child health, antenatal care, adolescent health, nutrition, delivery</li> <li>• Education on vaccines</li> <li>• Support outreach strategies</li> <li>• Administer medicine for post-partum hemorrhage</li> <li>• Referrals of clients to health posts</li> <li>• Supervised by nurse in charge</li> </ul> | <ul style="list-style-type: none"> <li>• Age: 25-50 years</li> <li>• Education: at least 4<sup>th</sup> grade in primary school</li> <li>• From and selected by local community</li> <li>• Willing to volunteer</li> </ul> | <ul style="list-style-type: none"> <li>• Initial training (30+ days, 10 days practice)</li> </ul> | <ul style="list-style-type: none"> <li>• Inconsistent - depends on project</li> <li>• Determined by CDS or NGO</li> </ul> |
| Home-based care providers ( <i>Dispensaire de Soins à Domicile</i> ; DSDOMs) | <ul style="list-style-type: none"> <li>• Created in 2008 [31]</li> </ul>                | <ul style="list-style-type: none"> <li>• Integrated management of childhood illnesses: malaria treatment and prevention, diarrhea treatment and prevention, acute respiratory infection treatment <ul style="list-style-type: none"> <li>○ In remote communities</li> </ul> </li> </ul>                                                                                                      | <ul style="list-style-type: none"> <li>• Able to read</li> <li>• From and selected by local community</li> <li>• Willing to volunteer</li> </ul>                                                                           | <ul style="list-style-type: none"> <li>• Initial training (30+ days, 10 days practice)</li> </ul> | <ul style="list-style-type: none"> <li>• Inconsistent - depend on project</li> <li>• Determined by CDS or NGO</li> </ul>  |

|  |                   |                                                                           |                                                                                                                                                                                                                                                                                                                                                                                                                                                        |                                                                                                                                                                     |                                                                                   |                                                                                                                                            |
|--|-------------------|---------------------------------------------------------------------------|--------------------------------------------------------------------------------------------------------------------------------------------------------------------------------------------------------------------------------------------------------------------------------------------------------------------------------------------------------------------------------------------------------------------------------------------------------|---------------------------------------------------------------------------------------------------------------------------------------------------------------------|-----------------------------------------------------------------------------------|--------------------------------------------------------------------------------------------------------------------------------------------|
|  |                   |                                                                           | <ul style="list-style-type: none"> <li>• Referrals of clients to <i>Agents de santé communautaires</i> (ASCs)</li> <li>• Supervised by nurse in charge</li> </ul>                                                                                                                                                                                                                                                                                      |                                                                                                                                                                     |                                                                                   |                                                                                                                                            |
|  | <i>Bajenu Gox</i> | <ul style="list-style-type: none"> <li>• Launched in 2009 [32]</li> </ul> | <ul style="list-style-type: none"> <li>• Promote reproductive, maternal, newborn and child health interventions- pre- and post-natal care, infant child nutrition, female and adolescent health, family planning and child vaccination</li> <li>• Outreach services: coordination and attendance</li> <li>• Door-to-door activities and referrals of clients to ASCs</li> <li>• Defaulter tracing and reminders to parents of outreach days</li> </ul> | <ul style="list-style-type: none"> <li>• Proven leader</li> <li>• Female</li> <li>• From and selected by local community</li> <li>• Willing to volunteer</li> </ul> | <ul style="list-style-type: none"> <li>• Initial training (40-55 days)</li> </ul> | <ul style="list-style-type: none"> <li>• Inconsistent - depend on project /responsibilities</li> <li>• Determined by CDS or NGO</li> </ul> |

|  |                              |                                                                                         |                                                                                                                                                                                                                                                                                                                                                                                                                                                                                       |                                                                                                                          |                                                                                   |                                                                                                                                            |
|--|------------------------------|-----------------------------------------------------------------------------------------|---------------------------------------------------------------------------------------------------------------------------------------------------------------------------------------------------------------------------------------------------------------------------------------------------------------------------------------------------------------------------------------------------------------------------------------------------------------------------------------|--------------------------------------------------------------------------------------------------------------------------|-----------------------------------------------------------------------------------|--------------------------------------------------------------------------------------------------------------------------------------------|
|  |                              |                                                                                         | <ul style="list-style-type: none"> <li>• Supervised by NGO employees, community development agents and head nurse</li> </ul>                                                                                                                                                                                                                                                                                                                                                          |                                                                                                                          |                                                                                   |                                                                                                                                            |
|  | <i>Relais communautaires</i> | <ul style="list-style-type: none"> <li>• Not clear when this was established</li> </ul> | <ul style="list-style-type: none"> <li>• Education and behavior change strategies: Maternal neonatal child health, integrated management of childhood illnesses topics, water, sanitation and hygiene (WASH)</li> <li>• Outreach services: coordination and attendance</li> <li>• Defaulter tracing</li> <li>• Door-to-door services</li> <li>• Text reminders to parents of vaccine days</li> <li>• Referrals of clients to ASCs</li> <li>• Supervised by nurse in charge</li> </ul> | <ul style="list-style-type: none"> <li>• From and selected by local community</li> <li>• Willing to volunteer</li> </ul> | <ul style="list-style-type: none"> <li>• Initial training (40-55 days)</li> </ul> | <ul style="list-style-type: none"> <li>• Inconsistent - depend on project /responsibilities</li> <li>• Determined by CDS or NGO</li> </ul> |

|        |                                       |                                                                                  |                                                                                                                                                                                                                                                                                                                                                                                               |                                                                                                                                                 |                                                                                                                                                     |                                                                                                     |
|--------|---------------------------------------|----------------------------------------------------------------------------------|-----------------------------------------------------------------------------------------------------------------------------------------------------------------------------------------------------------------------------------------------------------------------------------------------------------------------------------------------------------------------------------------------|-------------------------------------------------------------------------------------------------------------------------------------------------|-----------------------------------------------------------------------------------------------------------------------------------------------------|-----------------------------------------------------------------------------------------------------|
| Zambia | Neighborhood Health Committees (NHCs) | <ul style="list-style-type: none"> <li>• Introduced in the late 1990s</li> </ul> | <ul style="list-style-type: none"> <li>• Supervise other CHWs</li> <li>• Review reports</li> <li>• Contribute to action planning</li> <li>• Identify and address barriers</li> <li>• Hold monthly meetings with village leaders</li> <li>• Provide education on vaccines</li> <li>• Conduct follow-up visits</li> <li>• Conduct head count children aged 0-11 months and 1-5 years</li> </ul> | <ul style="list-style-type: none"> <li>• Willing to volunteer</li> <li>• Influential community member</li> <li>• Community appointed</li> </ul> | <ul style="list-style-type: none"> <li>• Receive one-week training from health center nurse in charge</li> <li>• Can be both CHW and NHC</li> </ul> | <ul style="list-style-type: none"> <li>• Volunteer</li> </ul>                                       |
|        | Safe Motherhood Action Groups         | <ul style="list-style-type: none"> <li>• Established in 2003 [33]</li> </ul>     | <ul style="list-style-type: none"> <li>• Education on pre-natal and infant immunizations</li> <li>• Identify maternal and newborn complications during pregnancy, delivery and post-natal period</li> </ul>                                                                                                                                                                                   | <ul style="list-style-type: none"> <li>• Community appointed</li> <li>• Must be respected, trusted and</li> </ul>                               | <ul style="list-style-type: none"> <li>• Standard 5 days training [34]</li> </ul>                                                                   | <ul style="list-style-type: none"> <li>• Inconsistent - shift responsibilities depending</li> </ul> |



|                             |                                                                                 |                                                                                                                                                                                                                            |                                                                                                         |                                                                                                 |                                                                                      |
|-----------------------------|---------------------------------------------------------------------------------|----------------------------------------------------------------------------------------------------------------------------------------------------------------------------------------------------------------------------|---------------------------------------------------------------------------------------------------------|-------------------------------------------------------------------------------------------------|--------------------------------------------------------------------------------------|
|                             |                                                                                 | <ul style="list-style-type: none"> <li>• Refer women with complications to health facilities</li> <li>• Persuade husbands to support their wives during pregnancy and accompany them for ante-natal care visits</li> </ul> | <ul style="list-style-type: none"> <li>accepted by community</li> <li>• Willing to volunteer</li> </ul> |                                                                                                 | <ul style="list-style-type: none"> <li>on incentives</li> <li>• Volunteer</li> </ul> |
| Growth Monitoring Promoters | <ul style="list-style-type: none"> <li>• Introduced in the 1980s[35]</li> </ul> | <ul style="list-style-type: none"> <li>• Education on nutrition for children aged 0 to 5 years</li> <li>• Promotes childhood immunizations</li> </ul>                                                                      | <ul style="list-style-type: none"> <li>• Willing to volunteer</li> </ul>                                | <ul style="list-style-type: none"> <li>• 4 days training; retrained every six months</li> </ul> | <ul style="list-style-type: none"> <li>• Volunteer</li> </ul>                        |

218 \* Renumeration was dependent on the district, CDS (Senegal), or external partner managing each cadre, and not based  
219 on the cadre itself.

220 3.1.2 Roles and Responsibilities. In the three countries, at least one CHW cadre exists. In  
221 Senegal and Zambia where more than one CHW cadre existed, most of CHWs performed  
222 similar roles. The lack of defined roles and localized training led to overlapping or  
223 deficient coverage of health services by cadres in Zambia and Senegal.

224 In Nepal, while vaccinations are carried out by salaried health workers, key informants  
225 indicated that FCHVs, “the backbone of the health system,” receive the most credit  
226 nationwide for improved immunization coverage. With the increase of paid frontline  
227 health workers in 2010, the responsibilities of FCHVs shifted to building awareness of  
228 available health services and their benefits at different community levels, including local  
229 mothers’ groups (Table 3).

230 *“FCHVs and the mothers’ group provide information regarding immunization*  
231 *campaigns or [the] regular immunization program. For new vaccines, it needs to*  
232 *[be] discussed with FCHVs and [the] mothers’ group - unless there is support and*  
233 *involvement in the program, it will not be successful because they are the one who*  
234 *build awareness and give knowledge and information to the people in the grass*  
235 *root level.” (Ministry, National level, Nepal)*

236 In Senegal, *relais* and *bajenu gox* conduct more targeted vaccine outreach although the  
237 five cadres of CHWs serve complementary roles in delivering frontline health services  
238 (Table 3). KIIs and the literature identified the *relais* and the *bajenu gox* as critical to the  
239 success of the vaccination program, and mothers referred to them as “real fighters” for  
240 the health of children. Community promotion actors are mobile, focusing on visiting  
241 communities, neighborhood organizations, and homes to promote awareness of and

242 create demand for disease prevention and health promotion activities, including  
243 vaccinations. Community members lauded the mobilization and the motivation these  
244 actors inspired which contributed to the improvement of vaccination programming.

245 *“The involvement of community actors helps them a lot because the community*  
246 *actors live with the populations and know the families. Today, even after the*  
247 *counting, they cannot determine the house of someone or they are given the*  
248 *wrong telephone number. But with the involvement of community actors, they*  
249 *go into the neighborhoods to bring back the children.” (Community health*  
250 *worker, community level, Senegal)*

251 In Zambia, key informants discussed the Neighborhood Health Committees (NHCs)  
252 extensively. NHCs are community-appointed volunteers whose primary role is to  
253 coordinate and manage other CHWs on behalf of health facility staff, including CHW  
254 recruitment, training, and attrition. NHCs also ensure that CHWs accurately report  
255 monthly activities and represent both CHWs and community members in annual action  
256 planning. NHCs’ responsibilities have increased in the last two decades to accommodate  
257 the increasing number of CHW roles across multiple health sectors, bridge the gap in  
258 human resources, and institutionalize the link between communities and the health  
259 system. Many individuals who hold NHCs role also hold another CHW position so as to  
260 receive training and other incentives through disease-specific initiatives.

261 *"A long time ago, as I said, we [community members] used to come in numbers*  
262 *here at the [health] center. It was difficult because we [the community] did not*  
263 *have enough [health facility] staff, so that’s how this [the NHC] program started.*

264 *And they [NHCs] started talking to people so that we [NHCs] help each other*  
265 *because members of staff were few. We [NHCs] are grateful they trained us, and*  
266 *we are working." (NHC member, community level, Zambia)*

267 The NHCs in Zambia were involved in action planning, identifying annual priorities,  
268 setting objectives, selecting strategies, determining indicators to monitor and evaluate  
269 activities, and estimating required activity resources and budget. Through their  
270 involvement, the NHCs indicated ownership over these responsibilities, which were  
271 formalized in the Reaching Every District (RED) program manuals.

### 272 **3.2. Motivation**

273 Community health workers in all three countries emphasized the meaning and value they  
274 found in their work. This was through recognition of their effort, incentives, and  
275 knowledge gained through training. CHWs in all the countries received training, which  
276 increased their knowledge on vaccinations and the present vaccine challenges. However,  
277 training varied and was sometimes inconsistent within specific countries. Supervision  
278 was done to ensure that CHWs performed their roles well; though, inconsistency in  
279 supervision was experienced in all countries, with key informants indicating workload  
280 and insufficient human resources as the barriers. Beyond the individual level, CHWs were  
281 motivated through the declaration and celebration of their villages by the national  
282 government as fully immunized, and successfully reaching all children in their villages  
283 through the implementation of Reaching Every Child (REC)/Reaching Every District  
284 (RED) strategies in Nepal, Senegal and Zambia, respectively.

285 3.2.1. Recognition. In all three countries, CHWs stated that recognition for their  
286 contributions and their status in the community were motivating factors. Communities,  
287 districts, and regions recognized the efforts and successes of CHWs through ceremonies,  
288 certificates, and media recognition. Community selection showed recognition and respect  
289 for the individual chosen to be a CHW. Particularly for women, CHWs gained stature  
290 through imparting valued knowledge, supporting caregivers, and contributing to positive  
291 health outcomes.

292 *“Our motivation is we have respect through this work. Everyone praises our*  
293 *work. They praise our contribution towards work for pregnant women, children*  
294 *and delivery of pregnant women.” (FCHV, Nepal)*

295 In Nepal, FCHVs appreciated the recognition for their role in increasing vaccine coverage.  
296 Some FCHVs received certificates. Villages, districts and provinces were declared fully  
297 immunized and celebrated by the national government through the Full Immunization  
298 Declaration (FID) Program in a bottom-up approach, and this motivated community  
299 workers and volunteers, and facilitated community buy in to immunization. Children who  
300 are fully vaccinated receive an official vaccination card with complete information on  
301 vaccines received from their health post for documentation. Increased public awareness  
302 and FCHV activities support the success of the Full Immunization Program (FIP) – which  
303 promotes urgency and action among all key players, including caregivers, religious and  
304 community leaders, and teachers.

305 *“We are all working together so that the children won’t miss vaccines. We can*  
306 *assure you that every child in our area have got vaccines.” (FCHV, Nepal)*

307 3.2.2. Incentives. In all countries, incentives were crucial to engage and motivate CHW  
308 volunteers. Though inconsistently distributed, tangible extrinsic resources - including  
309 money, food, bicycles, uniforms, stationary, childcare, and harvesting assistance -  
310 motivated CHWs and could reduce any intra-household tensions caused by absences due  
311 to the program. When CHWs areas of jurisdiction reported low vaccination coverage,  
312 especially in comparison to other districts or regions, their motivation to improve  
313 outcomes increased.

314 *“We do recognize them [FCHVs]. We do a public audit and take decisions on*  
315 *whom we should give credit; that is recognized by the community and system so*  
316 *that they become more motivated.” (Regional Director, Nepal)*

317 Intrinsic incentives were reported as critical motivators, particularly for those in Nepal  
318 and Senegal. CHWs highly respected their communities, and they served voluntarily  
319 because of the mutual respect between community and CHW. Seeing children in their  
320 communities protected from diseases and growing up healthy was additional motivation.  
321 FCHVs had pride and expressed happiness if all the children within their catchment areas  
322 were fully vaccinated. A FCHV in Nepal stated that “they worked for the good of the  
323 community.”

324 However, even with efforts to recognize CHW contributions, CHWs in all countries felt  
325 underappreciated by the national government. They expressed that the appreciation they  
326 received was more evident in the community than by the government. In all countries,  
327 CHWs felt they lacked commensurate compensation for their labor; they were required  
328 to commit to being a volunteer. Retention suffered because in some instances, CHWs were

329 forbidden to engage in income-generating activities, and compensation was often  
330 inconsistent. CHWs families often expected them to complete household labor even  
331 though they were engaged in volunteer responsibilities. Community health volunteers  
332 often supported and contributed to the work of paid CHWs and head nurses, resulting in  
333 additional workloads without appropriate compensation. Additionally, countries'  
334 projections for labor were unmet, leading to heavy responsibilities for CHWs.

335 **3.2.3. Capacity building.** CHW's knowledge increased through training and supportive  
336 supervision; in many cases, the opportunity to learn new skills and knowledge promoted  
337 self-value and enhanced their capacity to support the communities in the three countries.  
338 CHWs received formalized training through national health programs, NGOs, and multi-  
339 lateral partners; however, the length, breadth, and depth of training differed by country  
340 and trainer (Table 3). Key informants valued NGO and multilateral training, which  
341 provided financial incentives. Some FCHVs and *bajenu gox* reported the benefits of CHW  
342 literacy promoting groups. In all countries, CHW utilized their community knowledge to  
343 contribute to decision-making, which ultimately contributed to planning at higher levels.  
344 CHWs had frequent interactions with the local population, as they resided in those  
345 communities. This facilitated their deeper understanding of the community's needs,  
346 which they escalated during planning meetings. The frequent interactions between CHWs  
347 and community members enhanced community empowerment, enabling development  
348 and maintenance of social norms related to vaccination.

349 Supervision of CHWs occurred in all countries. Supportive supervision increased CHWs  
350 self-confidence through cross-learning and skills sharing facilitated teamwork, and  
351 enhanced relationships with healthcare workers. In Senegal, *bajenu gox* received

352 supportive supervision while working in communities. Their supervisors recorded field  
353 visit results on a standardized checklist, and sent supervision reports to the district  
354 medical offices for review. However, supervision in the field may be rare due to a lack of  
355 human resources. In Zambia, the NHCs have a supervisory position over CHW reporting,  
356 and play an essential role in data collection and evidence-based decision-making. NHCs  
357 were motivated by these responsibilities because they elevated the NHC's position, and  
358 described the emphasis on community-driven strategies to combat health challenges.  
359 Health facility staff and supervisors from the districts include NHCs in meetings which  
360 provide encouragement. According to national policy, by encouraging the possession and  
361 responsibility of data, the frontline workers review their performance against their stated  
362 goal, identify gaps that exist, and discuss ways to improve vaccination coverage.

363 *“There is the NHC that spearheads all community activities because all the*  
364 *CBVs, all community volunteers, they report through the NHC.” (District*  
365 *Nursing Officer, Zambia)*

366 Although CHWs in all countries desired consistent and increased opportunities for  
367 training; these differed significantly depending on the location and human, financial, and  
368 material resources.

369 **3.2.4 Empathy and compassion.** CHWs expressed being motivated by their sense of  
370 empathy and compassion for their communities in all three countries. CHWs understood  
371 and shared the feelings of their fellow community members and showed concern for their  
372 suffering and misfortune. This motivated CHWs to perform their roles well since they felt  
373 invested in the health of the community at large in addition to children's health. CHWs



374 understand the lived experiences of the community members and have compassion for  
375 the potential morbidity and mortality of children when not immunized against vaccine-  
376 preventable diseases. This increased their effort to focus on improving the health and  
377 wellbeing of children in their communities.

378 *“Vaccine prevent from many diseases that is also why people bring their children*  
379 *for vaccination. There were more Pneumonia cases and diarrheal diseases before*  
380 *but nowadays there are very less children who suffer from Pneumonia and*  
381 *Diarrhea. If we hear that some children have suffered from diseases then we feel*  
382 *very worried. We also feel responsible towards those children.” (FCHV, Nepal)*

383

### 384 3.3. Trust

385 CHWs increased community members’ trust in the formalized health system. CHWs were  
386 respected members of the community, with some individuals regarded as opinion leaders;  
387 this trust was facilitated by the selection of CHWs from the communities in which they  
388 lived. CHWs connected with the community by promoting and prompting vaccination. In  
389 Senegal and Zambia, CHWs facilitated the adaptation of REC/RED strategy to local  
390 context, ensuring community buy-in. These strategies required frequent interaction with  
391 community members - providing education, action planning, conducting surveys, and  
392 tracking vaccination records. Through such interactions, social relationships were built,  
393 which strengthened community trust in CHWs and the activities they carried out within  
394 these communities. Although all CHW cadres had roles they served towards improving  
395 the health and well-being of the communities, respondents identified a cadre of CHW that

396 they most trusted and felt they had the most investment in their health and their  
397 children's health (Table 3).

398 **3.3.1 Community engagement.** Communities in all three countries were involved in  
399 decision making, planning, design, governance and delivery of services. In Nepal, FCHVs  
400 are required to work in the communities they reside in; CHWs reported that this  
401 generated trust and promoted culturally and contextually appropriate messaging to  
402 diverse stakeholders. FCHVs educate community members in mothers' health groups  
403 (MHG), ensuring the group's integration into their assigned communities to share health  
404 information with community members. As FCHVs were embedded in the communities  
405 where they conducted outreach, their messaging incorporated differences in religion,  
406 tribe or caste, ethnicity, and language.

407 *"I: How much do community members trust the sources of Vaccination*  
408 *information? //P4: Yes, they have trust. //All at a time: yes, we believe on them.*  
409 *//P5: Because they will also learn some information from here and provides us*  
410 *other information. // P4: They will learn from here and teach us."* (Mothers,  
411 *Nepal)*

412 To address the lack of necessary human resources for community health outreach and  
413 support in Senegal, the Ministry of Health, under a USAID-funded community health  
414 plan, instituted the *bajenu gox* (godmothers) program in 2009. The *bajenu gox* were  
415 trusted older women - "proven female leaders" - living in the community who capitalized  
416 on their age and social role to support pregnant women and their families in pre- to post-  
417 natal health, including immunizations (Table 3). *Bajenu gox* duties were specifically

418 targeted at building relationships of trust with community members. Many mothers  
419 specifically praised the *bajenu gox* for taking the time to explain diseases that  
420 vaccinations targeted, when vaccinations were happening, follow-up and individualized  
421 planning.

422 *“There are criteria that really push us to choose bajenu gox who are listened to,*  
423 *who are considered wise individuals, who have influence, who have a voice that*  
424 *carries when it comes to the health of the population.” (EPI Focal Point, Senegal)*

425 *“Special mention to our bajenu gox. We are all women, and we see the support*  
426 *they give us; they are our mothers and at the same time our bajenu gox. They*  
427 *leave all their activities to follow us and our children...each time there is a*  
428 *vaccination to be given; they identify the people concerned and accompany them*  
429 *to be vaccinated. Because vaccination is very important, before we said that*  
430 *without it, we could catch all kinds of diseases such as measles and others, but*  
431 *now we have more vaccines and thank God we have fewer diseases, and all our*  
432 *children are protected.” (Mothers, Senegal)*

433 Trust between the health workers and the *bajenu gox* was enhanced through supportive  
434 supervision. NGO employees, community development agents, and head nurses were  
435 intended to provide supportive supervision for *bajenu gox* while they were working in  
436 communities, record field visit results on a standardized checklist, and send supervision  
437 reports to the district medical offices for review. This allowed for confidence and trust  
438 with service delivery among *bajenu gox*, the communities, and health care workers.

439 3.3.2 Knowledge sharing. In all countries, information and skills are shared between  
440 individuals or groups, and this included frequent interaction, and social relationships  
441 between CHWs, communities, and health workers. CHWs were involved in providing  
442 health education at facilities, thus creating awareness about immunization. In Nepal,  
443 health and immunization education were presented in monthly meetings; content was  
444 selected and tailored depending on literacy, misinformation, and cultural norms. In  
445 women's savings groups (groups of women who come together to save, and lend, money  
446 to members), FCHVs emphasized the link between children's health and future  
447 educational and occupational opportunities. FCHVs also approached caregivers  
448 individually, discussing potential barriers to immunization, addressing specific  
449 information caregivers lacked, and encouraging immunization access.

450 *“FCHV sisters also help us and teach us about [health]. They also teach and train*  
451 *us to get vaccination for the children... We trust [the information] and it is for our*  
452 *children. It is better not to suffer from any diseases. First, we need to have proper*  
453 *information about it and only then trust it.” (Female Community Health*  
454 *Volunteer, Nepal)*

455 *“From the time of pregnancy till the birth of the child, the people trust us in this*  
456 *process. People trust us more than their family members and come to take*  
457 *suggestions from us if they face problems. Also, they do as we suggest.” (Female*  
458 *Community Health Volunteer, Nepal)*

459 In Senegal, the *bajenu gox* included multiple family members in educational outreach on  
460 vaccinations and maternal and child health. *Bajenu gox* held education groups for

461 adolescent girls in addition to women of all ages to target misinformation and mediate  
462 between different age groups. In recent years, *Bajenu gox* have also conducted outreach  
463 with fathers' groups, aiding in full family approval of childhood vaccinations. In Zambia,  
464 NHCs played a prominent role in community sensitization, outreach, and vaccine  
465 education in most of our research communities in Zambia. NHCs were a trusted source  
466 of information for community members since they were recruited by community leaders  
467 and worked closely with health facility staff to coordinate outreach sessions. Consistent  
468 follow-through of outreach sessions contributed to community members' trust in NHCs  
469 and, by extension, the health system. NHCs also worked to dispel myths and  
470 misconceptions about vaccinations by educating parents on the benefits. For example, if  
471 the barrier to access were due to a parent's competing priorities, the NHC member would  
472 escort the child to the outreach event.

473 *"There is some time on the radio, and they call the NHC to come and talk about*  
474 *health issues. They encourage, especially in the village. They announce that next*  
475 *week, 'do not delay the children to come for vaccinations.' Yes, because of the*  
476 *community radio, they let anyone talk. Yes, especially the NHC, they talk a lot on*  
477 *encouraging other vaccines."* (Head Woman, Zambia)

478 CHWs were involved in ensuring an accurate community registry (organization), had  
479 knowledge of communities and children's vaccination status (trust), and a drive to  
480 conduct specialized outreach to increase coverage (motivation).

## 481 Discussion

482 We conducted a qualitative study to assess factors that motivated or inhibited  
483 engagement of the CHW programs in three countries between 2000 and 2019 - Nepal,  
484 Senegal and Zambia. Our findings suggest three domains behind community health  
485 workers - organization, motivation, and trust - strongly contributed to improve the  
486 implementation of health programming and may have positively influenced vaccination  
487 during our targeted time period. Organization through expansion of CHW types  
488 motivated CHWs to carry out their roles and responsibilities related to vaccination. Trust  
489 between communities, healthcare workers, and CHWs contributed to CHWs' motivation  
490 - resulting in the improved implementation of vaccination programming. Our findings  
491 are policy relevant for other countries looking to expand vaccination through CHW  
492 platforms; however, those looking to apply these findings should be mindful that  
493 adaptation to local context is crucial.

### 494 Organization

495 Distinct cadres of CHWs had specific roles and responsibilities assigned to them in the  
496 three countries, which aligned with strategies implemented in other countries[36].  
497 Diversification of roles increased the sense of responsibility, confidence and commitment  
498 of CHWs to their work. This study, however, pointed out insufficiency in CHWs  
499 supervision, like findings from other studies within similar contexts[16, 37]. Since CHWs  
500 in middle and low-income countries are not healthcare professionals, increased  
501 supportive supervision may increase and enhance retention of knowledge, thus increasing  
502 their confidence. CHWs working together with other health workers and receiving

503 required supervision could increase their confidence in work, and their motivation to  
504 work harder, thus improving their performance.

## 505 Motivation

506 Motivation of CHWs was increased through extrinsic “work for the good of the  
507 community” and intrinsic incentives- certificates, recognition, stipends, and trust. Social  
508 cohesion- the “capacity of society to ensure wellbeing of all its members by minimizing  
509 disparities and avoiding marginalization” in regard to the health and wellbeing of children  
510 was seen in the three countries [38]. Capacity building, public awareness, involvement of  
511 CHWs and communities in different health programs, and the recognition of childhood  
512 vaccination as a human right enhanced a generational shift in existing norms - hence  
513 communities increasingly embracing vaccination. In Asia and Africa, a multiple case  
514 study found that extrinsic motivation to improved CHW work, similar to the findings of  
515 this study. Organization and cultural context shaped the motivation of CHWs, as  
516 individual beliefs, pleasure and happiness drawn from wellbeing of children in the  
517 communities was also motivating [39]. In Zambia, safe motherhood action groups  
518 expressed happiness with their work because they helped saved women’s lives [40]. In  
519 Nepal, Senegal and Zambia, CHWs were part of the communities they served, increasing  
520 their sense of belonging and trust, therefore increasing their motivation to dispense their  
521 duties.

522 CHWs are often the backbone of the frontline health systems in many parts of the world.  
523 Yet, this workforce, most of whom are women, remain unpaid, often resulting in undue  
524 psychosocial stress, food insecurity, and time burdens[41, 42]. Unpaid work, including  
525 the roles of female CHWs, leave CHWs time poor, being unable to meet their basic needs,

526 or participate in social or political activities - contributing to the widening equity gap and  
527 expanding the poverty cycle[43]. CHWs' great contributions to healthcare delivery is  
528 evident; however, limited attention has been placed on their remuneration. Nevertheless,  
529 payment of living wages to CHWs is a fundamental right[44]. WHO now recommends  
530 remunerating practicing CHWs for their work with financial package commensurate with  
531 job demands, complexity, number of hours, training and roles and responsibilities[8].  
532 Nepal, Senegal and Zambia provide incentives to CHWs; however, this is  
533 incommensurate with their work[22]. Similarly, countries like Sierra Leone and Liberia  
534 have policies that guide the remuneration of CHWs, but CHWs from these countries  
535 expressed dissatisfaction with remunerations in place, highlighting the need to consider  
536 contextual factors and roles and responsibilities when planning and budgeting for CHW  
537 remuneration[45]. Although consistency in the incentivization of FCHVs was observed  
538 due to integration, and the financing of CHW programming at the national level in Nepal,  
539 Senegal and Zambia reported inconsistencies. In low- and lower-middle-income  
540 countries, CHWs are not adequately remunerated, even with long service to the  
541 community and numerous contributions to elimination of diseases, reducing the menace  
542 of diseases, and increasing the reach of immunization programmes. Furthermore, the  
543 roles of CHWs are deemed to fit into the other domestic activities, which are mostly done  
544 by women [46].

545 Nevertheless, the incentivization of CHWs in all countries was associated with higher  
546 motivation to create public awareness and conduct community mobilization. Countries  
547 with clear financial management systems that include budgets for CHWs have seen great  
548 contributions of CHWs in general healthcare service delivery. Ethiopia and, Bangladesh,



549 among others, successfully implemented a CHW strategy which has seen their vaccination  
550 coverage increase [36]. However, CHWs remuneration varies between countries, because  
551 of limited political will, targeted funding, and historical underpinnings and addressing  
552 these challenges may improve CHW performance and retention - thus sustainability - of  
553 CHW programming[22, 47]. Lack of consistent income could fail to overcome intra-  
554 household pressures, address competing priorities at the household level, and ultimately  
555 lead to decreased morale and retention of CHWs. Standardizing CHWs compensation  
556 within different settings may be of value, which could be done through governments  
557 setting aside a funding stream dedicated to CHWs and considering other sources of  
558 funding to supplement existing sources. These strategies may reduce the financial  
559 challenges experienced by the CHWs within these countries.

## 560 Trust

561 Trust and community ownership were generated through the CHWs selection process,  
562 which increased their motivation to provide immunization-related services to the  
563 communities in Nepal, Senegal and Zambia. CHWs shared information on vaccination in  
564 local languages and reached hard-to-reach areas and minority communities. Being  
565 dependable, accountable, and respected members of the community, CHWs understand  
566 the contexts of the communities they serve [16, 48]. This generates trust and enhances  
567 accountability through 1) CHW closeness to the community and local healthcare facilities,  
568 2) uptake of information provided, and 3) ease in community entry, and that of the health  
569 workers thus reducing child vaccination gaps especially among the illiterate mothers[49].  
570 Trust between caregivers and CHWs resulted in adequate knowledge and compliance with  
571 vaccination recommendations.

572 Changes in healthcare, including introduction of new vaccines and emerging epidemics,  
573 add another layer of work to CHWs and can be addressed through different cadres with  
574 specific responsibilities. The recent COVID-19 pandemic highlights the contribution of  
575 CHWs in creating demand for vaccination through addressing vaccine hesitancy,  
576 leveraging on their existing trust within communities [50]. Strategic approaches that  
577 allow for expanding CHW cadres are necessary to bridge the gap in human resources, and  
578 provide vaccination services to disadvantaged populations [51].

579 Governments have committed to addressing some of the issues that CHWs have voiced;  
580 to combat shortages of community health workers in Zambia, the central government  
581 committed to increasing the number of community health workers, investing in training,  
582 and retaining more workers. The Zambia National Health Strategic Plans and the 2010  
583 and 2019-2021 National Community Health Worker strategies instituted guidelines to  
584 formalize and harmonize the roles of frontline workers to decrease overlap in  
585 responsibilities, as well as uniform incentives. The government committed to bringing  
586 30,000 more workers on board and increasing specialization of cadres and workers. In  
587 2018, Senegal's government committed to creating more formalized training for different  
588 cadres. The 2019-2021 CHW Strategy identified disharmonized incentives as a challenge  
589 and allocated the district health office to coordinate and oversee CHW incentives (such as  
590 lunch and transport reimbursement), supplies (like protective clothing), orientation and  
591 training, and involvement in national campaigns. In Nepal, FIP worked well to motivate  
592 service providers, community workers, volunteers, and parents.

## 593 Limitations

594 This study has several limitations. First, the research tools focused on the factors that  
595 drove catalytic change and did not focus on interventions or policies that were  
596 unsuccessful. Second, using qualitative methods to understand historical events was  
597 challenging; interviewees often spoke about current experiences rather than discussing  
598 historical factors. However, research assistants probed respondents to reflect on  
599 longitudinal changes in the immunization program. Third, the scope of our study was  
600 extensive, and CHWs were only one component of our research. Fourth, some policy  
601 documents – including national-level strategic plans - were not available for our review.  
602 And finally, the COVID-19 pandemic impacted data collection in Senegal, with a focus on  
603 response and safety taking priority over data collection.

## 604 Conclusion

605 This study highlighted essential qualities of community health worker programs in  
606 countries with high vaccination coverage – namely, organization, motivation, and trust.  
607 Each country had distinct CHW cadres involved in the implementation of vaccination  
608 programming. Additionally, CHWs were selected from their communities - which  
609 generated trust among community members and healthcare staff. CHWs bridge the  
610 equity gap in access to vaccination services through involvement of female volunteers,  
611 and CHWs enabled wider reach of vaccination services to minority populations and  
612 populations in hard-to-reach areas who otherwise could not be easily reached by  
613 healthcare workers. Although improvements in vaccination programming were seen in all  
614 three countries, CHWs faced challenges in providing adequate services in their

615 communities. Workload, low and inconsistent compensation, inconsistency in training  
616 duration and scope, and supervision resulted in demotivation and high turnover of CHWs  
617 in all countries. While plans for changes in the CHW programming report increased  
618 duties and responsibilities for CHWs, the governments in all countries still need to  
619 adequately address issues related to the recognition of CHWs, especially their  
620 compensation. Based on their contexts, countries should focus more on ways of  
621 addressing such challenges, and country-specific research on strategies to ensure  
622 consistent funding for CHWs would be beneficial.

### 623 Acknowledgements

624 We thank Center for Molecular Dynamics, Nepal (CMDN), the Institut de Recherche en  
625 Santé de Surveillance Epidémiologique et de Formation (IRESSEF) in Dakar, Senegal and  
626 the Center for Family Health Research in Zambia for their partnership in this study. We  
627 gratefully acknowledge the participants who gave their time and insights to help us better  
628 understand the vaccine delivery system in Nepal, Senegal, and Zambia, along with  
629 facilitators from the Ministry of Health and Population, Department of Health Services,  
630 and the Family Welfare Division of Nepal, Ministry of Health and Social Action in  
631 Senegal, and the Ministry of Health in Zambia for supporting this research. We thank  
632 Chin-En (King) Ai, Lauren Harper, Allison Wray from Emory University and Saad Omer  
633 from Yale University for their contribution to this project. In addition, we thank Sarah  
634 Chesemore, Anna Rapp, Tove Ryman, and Ethan Wong from the Bill and Melinda Gates  
635 Foundation; Kate Buellesbach, Nancy Fullman, Nathaniel Gerthe, Gloria Ikilezi, Caitlyn  
636 Mason, David Phillips, and Oliver Rothschild, Jordan-Tate Thomas, and Angela Wang  
637 from Gates Ventures for technical support; and the Vaccine Exemplars Research Advisory

638 Group for their insights, specifically Agnes Binagwaho, Laura Crow, Carolina Danovaro,  
639 Anuradha Gupta, Heidi Larson, Penelope Masumbu, Kate O'Brien, Helen Rees, Lora  
640 Shimp, and Aaron Wallace.

## 641 References

- 642 1. Orenstein WA, Ahmed R. Simply put: Vaccination saves lives. National Acad Sciences; 2017. p.  
643 4031-3.
- 644 2. Rodrigues CM, Plotkin SA. Impact of vaccines; health, economic and social perspectives.  
645 Frontiers in microbiology. 2020;11:1526.
- 646 3. WHO. Immunization Agenda 2030: A Global Strategy To Leave No One Behind. 2020.
- 647 4. WHO. Global strategy on human resources for health: workforce 2030. 2016.
- 648 5. WHO. Health workforce 2021 [cited 2022].
- 649 6. Love MB, Gardner K, Legion V. Community health workers: who they are and what they do.  
650 Health Education & Behavior. 1997;24(4):510-22.
- 651 7. Masis L, Gichaga A, Zerayacob T, Lu C, Perry HB. Community health workers at the dawn of a  
652 new era: 4. Programme financing. Health Research Policy and Systems. 2021;19(3):1-17.
- 653 8. WHO. WHO guideline on health policy and system support to optimize community health  
654 worker programmes: World Health Organization; 2018.
- 655 9. Pérez LM, Martínez J. Community health workers: social justice and policy advocates for  
656 community health and well-being. American journal of public health. 2008;98(1):11-4.
- 657 10. Patel AR, Nowalk MP. Expanding immunization coverage in rural India: A review of evidence for  
658 the role of community health workers. Vaccine. 2010;28(3):604-13.
- 659 11. Hester KA, Sakas Z, Ogutu EA, Dixit S, Ellis AS, Yang C, et al. Critical interventions for demand  
660 generation in Zambia, Nepal, and Senegal with regards to the 5C psychological antecedents of  
661 vaccination. medRxiv. 2022.
- 662 12. Hester KA, Sakas Z, Ellis AS, Bose AS, Darwar R, Gautam J, et al. Critical success factors for high  
663 routine immunization performance: A case study of Nepal. Vaccine: X. 2022;12:100214.
- 664 13. Sakas Z, Hester KA, Rodriguez K, Diatta SA, Ellis AS, Gueye DM, et al. Critical success factors for  
665 high routine immunization performance: A case study of Senegal. medRxiv. 2022:2022.01.25.22269847.
- 666 14. Micek K, Hester KA, Chanda C, Darwar R, Dounebaine B, Ellis AS, et al. Critical success factors for  
667 routine immunization performance: A case study of Zambia 2000 to 2018. Vaccine: X. 2022:100166.
- 668 15. WGH. Subsidizing Global Health: Women's unpaid work in Health Systems. 2022.
- 669 16. Pallas SW, Minhas D, Pérez-Escamilla R, Taylor L, Curry L, Bradley EH. Community health workers  
670 in low- and middle-income countries: what do we know about scaling up and sustainability? Am J Public  
671 Health. 2013;103(7):e74-82.
- 672 17. Bednarczyk R, Hester K, Dixit S, Ellis A, Escoffery C, Kilembe W, et al. Protocol: Identification and  
673 evaluation of critical factors in achieving high and sustained childhood immunization coverage in  
674 selected low- and lower-middle income countries 2021.
- 675 18. Exemplars. Exemplars in Global Health: Making Better Decisions in Global Health: Understand  
676 Positive Outliers to Inform Policy and Practice. 2021 [Available from: <https://www.exemplars.health/>].
- 677 19. Gottert A, McClair TL, Hossain S, Dakouo SP, Abuya T, Kirk K, et al. Development and validation  
678 of a multi-dimensional scale to assess community health worker motivation. J Glob Health.  
679 2021;11:07008.

- 680 20. Agarwal S, Sripad P, Johnson C, Kirk K, Bellows B, Ana J, et al. A conceptual framework for  
681 measuring community health workforce performance within primary health care systems. *Human*  
682 *resources for health*. 2019;17(1):1-20.
- 683 21. Franco LM, Bennett S, Kanfer R. Health sector reform and public sector health worker  
684 motivation: a conceptual framework. *Soc Sci Med*. 2002;54(8):1255-66.
- 685 22. Colvin CJ, Hodgins S, Perry HB. Community health workers at the dawn of a new era: 8.  
686 Incentives and remuneration. *Health Research Policy and Systems*. 2021;19(3):106.
- 687 23. O'Mara-Eves A, Brunton G, Oliver S, Kavanagh J, Jamal F, Thomas J. The effectiveness of  
688 community engagement in public health interventions for disadvantaged groups: a meta-analysis. *BMC*  
689 *Public Health*. 2015;15(1):129.
- 690 24. Rohman A, Eliyana A, Purwana D, Hamidah H. Individual and organizational factors' effect on  
691 knowledge sharing behavior. *Entrepreneurship and Sustainability Issues*. 2020;8(1):38.
- 692 25. Pfadenhauer LM, Gerhardus A, Mozygemba K, Lysdahl KB, Booth A, Hofmann B, et al. Making  
693 sense of complexity in context and implementation: the Context and Implementation of Complex  
694 Interventions (CICI) framework. *Implementation science*. 2017;12(1):1-17.
- 695 26. Damschroder LJ, Aron DC, Keith RE, Kirsh SR, Alexander JA, Lowery JC. Fostering implementation  
696 of health services research findings into practice: a consolidated framework for advancing  
697 implementation science. *Implementation science*. 2009;4(1):1-15.
- 698 27. Sakas Z, Hester KA, Ellis AS, Ogutu EA, Rodriguez K, Bednarczyk RA, et al. Critical success factors  
699 for high routine immunization performance: A multiple case study analysis of Nepal, Senegal, and  
700 Zambia. *medRxiv*. 2022:2022.11.08.22282076.
- 701 28. Katigbak C, Van Devanter N, Islam N, Trinh-Shevrin C. Partners in health: a conceptual  
702 framework for the role of community health workers in facilitating patients' adoption of healthy  
703 behaviors. *American journal of public health*. 2015;105(5):872-80.
- 704 29. Sripad P, McClair TL, Casseus A, Hossain S, Abuya T, Gottert A. Measuring client trust in  
705 community health workers: A multi-country validation study. *J Glob Health*. 2021;11:07009.
- 706 30. Khatri RB, Mishra SR, Khanal V. Female Community Health Volunteers in Community-Based  
707 Health Programs of Nepal: Future Perspective. *Frontiers in Public Health*. 2017;5.
- 708 31. Kristen Devlin KFE, and Tanvi Pandit-Rajani. . *Community Health Systems Catalog*  
709 *Country Profile: Senegal*. Arlington, VA: Advancing Partners & Communities. 2016.
- 710 32. Cothran D. Senegal's community-based health System model: structure, strategies, and learning.  
711 2019.
- 712 33. Ensor T, Green C, Quigley P, Badru AR, Kaluba D, Kureya T. Mobilizing communities to improve  
713 maternal health: results of an intervention in rural Zambia. *Bulletin of the World Health Organization*.  
714 2013;92:51-9.
- 715 34. Jacobs C, Michelo C, Moshabela M. Implementation of a community-based intervention in the  
716 most rural and remote districts of Zambia: a process evaluation of safe motherhood action groups.  
717 *Implementation science* : IS. 2018;13(1):74-.
- 718 35. Zulu C, Michelo C, Mubita-Ngoma C. Evaluation of Training and Implementation Program for  
719 Community-Based Child Growth Monitors and Promoters in Zambia. 2017;1:34-9.
- 720 36. Perry H. A brief history of community health worker programs. *Developing and strengthening*  
721 *community health worker programs at scale: a reference guide and case studies for program managers*  
722 *and policymakers, USAID, MCHIP*. 2013.
- 723 37. Phiri SC, Prust ML, Chibawe CP, Misapa R, van den Broek JW, Wilmink N. An exploration of  
724 facilitators and challenges in the scale-up of a national, public sector community health worker cadre in  
725 Zambia: a qualitative study. *Human Resources for Health*. 2017;15(1):40.

- 726 38. COUNCIL OE. Towards an active, fair and socially cohesive Europe. Report of high level task force  
727 on social cohesion. TFSC (2007); 2008.
- 728 39. Olaniran A, Madaj B, Bar-Zeev S, Banke-Thomas A, van den Broek N. Factors influencing  
729 motivation and job satisfaction of community health workers in Africa and Asia-A multi-country study.  
730 Int J Health Plann Manage. 2022;37(1):112-32.
- 731 40. Sialubanje C, Massar K, Horstkotte L, Hamer DH, Ruiter RAC. Increasing utilisation of skilled  
732 facility-based maternal healthcare services in rural Zambia: the role of safe motherhood action groups.  
733 Reproductive Health. 2017;14(1):81.
- 734 41. Kasteng F, Settumba S, Källander K, Vassall A. Valuing the work of unpaid community health  
735 workers and exploring the incentives to volunteering in rural Africa. Health Policy Plan. 2016;31(2):205-  
736 16.
- 737 42. Panjabi R. Community Health Workers Are Vital; Governments Should Be Paying Them. TIME.  
738 2019.
- 739 43. Coffey C, Espinoza Revollo P, Harvey R, Lawson M, Parvez Butt A, Piaget K, et al. Time to Care:  
740 Unpaid and underpaid care work and the global inequality crisis: Oxfam; 2020.
- 741 44. Maes K. The Lives of Community Health Workers: Local Labor and Global Health in Urban  
742 Ethiopia. New York Routledge 2016. 188 p.
- 743 45. Raven J, Wurie H, Idriss A, Bah AJ, Baba A, Nallo G, et al. How should community health workers  
744 in fragile contexts be supported: qualitative evidence from Sierra Leone, Liberia and Democratic  
745 Republic of Congo. Human Resources for Health. 2020;18(1):58.
- 746 46. Central C. Gender and Community Health Workers: Three focus areas for programme managers  
747 and policy makers 2018 [Available from: [https://chwcentral.org/twg\\_article/gender-and-community-  
748 health-workers-three-focus-areas-for-programme-managers-and-policy-makers/](https://chwcentral.org/twg_article/gender-and-community-health-workers-three-focus-areas-for-programme-managers-and-policy-makers/)].
- 749 47. Ballard M, Westgate C, Alban R, Choudhury N, Adamjee R, Schwarz R, et al. Compensation  
750 models for community health workers: Comparison of legal frameworks across five countries. Journal of  
751 global health. 2021;11:04010-.
- 752 48. Kane S, Kok M, Ormel H, Otiso L, Sidat M, Namakhoma I, et al. Limits and opportunities to  
753 community health worker empowerment: A multi-country comparative study. Soc Sci Med.  
754 2016;164:27-34.
- 755 49. Lee H-Y, Oh J, Heo J, Abraha A, Perkins JM, Lee J-K, et al. Association between maternal literacy  
756 and child vaccination in Ethiopia and southeastern India and the moderating role of health workers: a  
757 multilevel regression analysis of the Young Lives study. Global Health Action. 2019;12(1):1581467.
- 758 50. Dixit SM, Sarr M, Gueye DM, Muther K, Yarnko TR, Bednarczyk RA, et al. Addressing disruptions  
759 in childhood routine immunisation services during the COVID-19 pandemic: perspectives from Nepal,  
760 Senegal and Liberia. BMJ Global Health. 2021;6(7):e005031.
- 761 51. Schleiff MJ, Aitken I, Alam MA, Damtew ZA, Perry HB. Community health workers at the dawn of  
762 a new era: 6. Recruitment, training, and continuing education. Health Research Policy and Systems.  
763 2021;19(3):1-28.

764



**Figure 1. Summary figure of CHW domains that shaped vaccination in Nepal, Senegal and Zambia**

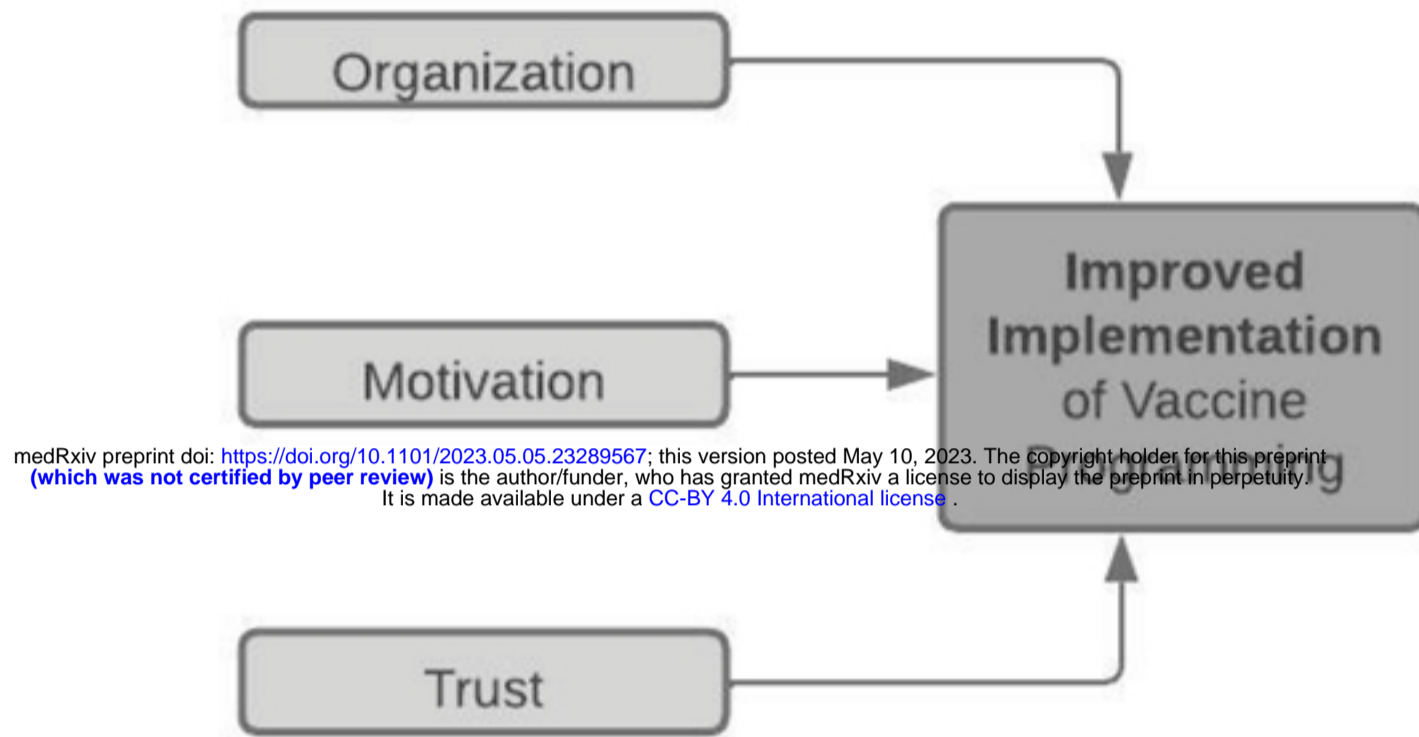

Source: https://medrxiv.org/content/10.1101/2023.05.05.23289567.full.pdf
